# Supplementary material for: Assessing the swelling behavior of oil paint in fatty acid methyl esters (FAMEs)
Source: Royal Society of Chemistry journal article supplement (doi:10.1039/d4ra07464e), 2024-01-01
Supplement: d4ra07464e1.pdf [file d4ra07464e1.pdf]

| Time (s) | Methyl Hexanoate |         | Methyl Octanoate |         | Methyl Laurate |         | Methyl Myristate |         | Methyl Oleate |         | Mineral Spirits |         | Ethanol      |         |
|----------|------------------|---------|------------------|---------|----------------|---------|------------------|---------|---------------|---------|-----------------|---------|--------------|---------|
|          | Swelling (%)     | Error   | Swelling (%)     | Error   | Swelling (%)   | Error   | Swelling (%)     | Error   | Swelling (%)  | Error   | Swelling (%)    | Error   | Swelling (%) | Error   |
| 0        | 0                | 0       | 0                | 0       | 0              | 0       | 0                | 0       | 0             | 0       | 0               | 0       | 0            | 0       |
| 12       | 1.545            | 0.34035 | 0.76681          | 0.17852 | 0.02184        | 0.62747 | 0.84444          | 0.37304 | 0.45441       | 0.42148 | 0.6134          | 0.73873 | 0.91829      | 0.18977 |
| 24       | 2.71072          | 0.33368 | 0.75082          | 0.73475 | 1.38646        | 0.75302 | 1.46947          | 0.60687 | 0.73932       | 0.52859 | 0.63265         | 0.73616 | 0.96364      | 0.19915 |
| 36       | 2.79628          | 0.51221 | 2.76171          | 0.28851 | 2.59118        | 0.87142 | 1.95499          | 0.79266 | 1.48406       | 0.55511 | 2.16045         | 0.54658 | 1.04139      | 0.06137 |
| 48       | 3.04845          | 0.75752 | 2.71941          | 0.36344 | 2.83412        | 0.84329 | 2.36244          | 0.97507 | 2.5285        | 1.0693  | 2.56409         | 0.66921 | 1.239        | 0.21249 |
| 60       | 3.19855          | 0.32066 | 3.16256          | 0.48342 | 3.92046        | 0.89913 | 2.3261           | 1.1012  | 4.68831       | 0.92578 | 2.55325         | 0.67238 | 1.36468      | 0.26541 |
| 72       | 3.93786          | 0.83919 | 4.10849          | 0.58764 | 4.16182        | 0.83223 | 2.9017           | 0.9805  | 4.91253       | 0.90272 | 2.81577         | 0.8234  | 1.15333      | 0.0411  |
| 84       | 4.46173          | 0.40325 | 4.08539          | 0.55567 | 4.26239        | 0.83291 | 3.07982          | 0.96498 | 4.9162        | 0.94386 | 2.95047         | 0.86415 | 1.18486      | 0.04596 |
| 96       | 4.16572          | 0.51764 | 4.43535          | 0.68945 | 4.39599        | 0.73625 | 3.53109          | 0.90332 | 5.00889       | 0.96657 | 3.17218         | 1.02029 | 1.22088      | 0.10618 |
| 108      | 4.37202          | 0.53377 | 4.66732          | 0.63577 | 4.4672         | 0.82694 | 3.63794          | 0.92035 | 4.95347       | 0.82777 | 3.17441         | 0.93703 | 1.28253      | 0.09212 |
| 120      | 4.8212           | 0.7746  | 4.71926          | 0.74584 | 4.59268        | 0.7512  | 3.72383          | 0.97653 | 5.10647       | 0.88875 | 3.26162         | 1.00635 | 1.32426      | 0.10326 |
| 132      | 4.90279          | 0.83289 | 4.66483          | 0.79646 | 4.59674        | 0.86053 | 3.65308          | 0.86457 | 5.12          | 0.92096 | 3.28972         | 0.96005 | 1.37459      | 0.14129 |
| 144      | 5.07745          | 0.94187 | 4.71039          | 0.66295 | 4.49897        | 0.82151 | 3.63187          | 0.85295 | 5.15          | 0.95036 | 3.35026         | 0.98166 | 1.35533      | 0.16614 |
| 156      | 5.35979          | 1.1089  | 4.76703          | 0.66142 | 4.3866         | 0.84252 | 3.66322          | 0.81771 | 5.16566       | 0.91692 | 3.27706         | 0.87263 | 1.33777      | 0.18604 |
| 168      | 5.11331          | 0.89002 | 4.84264          | 0.63916 | 4.54891        | 0.93799 | 3.70852          | 0.81592 | 5.23782       | 0.93505 | 3.17143         | 0.93662 | 1.45092      | 0.13888 |
| 180      | 5.32425          | 0.92709 | 4.81177          | 0.62334 | 4.61316        | 0.96423 | 3.72464          | 0.83684 | 5.21          | 0.92902 | 3.27405         | 1.00175 | 1.46645      | 0.14614 |
| 200      | 5.23342          | 0.84773 | 4.87678          | 0.65565 | 4.6889         | 0.99703 | 3.73781          | 0.80235 | 5.26          | 0.92902 | 3.21958         | 1.06144 | 1.50388      | 0.17726 |
| 220      | 5.56317          | 1.0366  | 5.01171          | 0.70948 | 4.668          | 0.98441 | 3.78143          | 0.73825 | 5.29055       | 0.92123 | 3.3174          | 1.05598 | 1.52036      | 0.20352 |
| 240      | 5.74385          | 1.16023 | 5.05544          | 0.7079  | 4.72535        | 1.03129 | 3.7648           | 0.71226 | 5.32          | 0.92403 | 3.31281         | 1.12977 | 1.53879      | 0.21691 |
| 260      | 6.17             | 1.76422 | 5.08741          | 0.70136 | 4.71112        | 0.98632 | 3.84492          | 0.7588  | 5.29          | 0.92139 | 3.28742         | 1.05856 | 1.60597      | 0.25503 |
| 300      | 6.18992          | 1.37546 | 5.22551          | 0.73089 | 4.80262        | 1.1711  | 3.89665          | 0.64115 | 5.36552       | 0.91824 | 3.33613         | 1.09556 | 1.74146      | 0.30564 |
| 340      | 6.26944          | 1.40747 | 5.26337          | 0.77248 | 4.8566         | 1.14519 | 3.94031          | 0.63734 | 5.45393       | 0.94694 | 3.2538          | 1.07414 | 1.7492       | 0.32507 |
| 380      | 6.45496          | 1.45903 | 5.46386          | 0.86635 | 4.90196        | 1.15058 | 4.0261           | 0.64349 | 5.50784       | 0.9497  | 3.29971         | 1.11942 | 1.87492      | 0.41119 |
| 420      | 6.5484           | 1.3776  | 5.4516           | 0.77355 | 4.91544        | 1.19868 | 4.13289          | 0.63125 | 5.51939       | 0.9661  | 3.27576         | 1.14552 | 1.92054      | 0.49392 |
| 460      | 6.65522          | 1.35735 | 5.51754          | 0.82226 | 4.96604        | 1.16258 | 4.15636          | 0.65106 | 5.586         | 0.95551 | 3.30714         | 1.13015 | 1.9928       | 0.52607 |
| 500      | 6.7591           | 1.36942 | 5.48002          | 0.79506 | 5.03567        | 1.20395 | 4.13772          | 0.706   | 5.49803       | 0.91962 | 3.24343         | 1.14177 | 2.1122       | 0.62503 |
| 540      | 6.81121          | 1.27107 | 5.66591          | 0.81678 | 5.05316        | 1.20256 | 4.20219          | 0.70036 | 5.54224       | 0.92333 | 3.21085         | 1.13394 | 2.19455      | 0.65144 |
| 580      | 6.95143          | 1.31044 | 5.67355          | 0.82365 | 5.12488        | 1.26657 | 4.22748          | 0.69714 | 5.62251       | 0.95112 | 3.23951         | 1.1533  | 2.27846      | 0.67889 |
| 620      | 6.9983           | 1.2894  | 5.83545          | 0.88649 | 5.1114         | 1.16914 | 4.27085          | 0.67686 | 5.59958       | 0.94074 | 3.21936         | 1.14598 | 2.38104      | 0.75649 |
| 660      | 7.10102          | 1.33496 | 5.92419          | 0.91363 | 5.12223        | 1.17294 | 4.36093          | 0.69362 | 5.63046       | 0.9799  | 3.20896         | 1.11265 | 2.51944      | 0.8708  |
| 700      | 7.7599           | 1.75832 | 5.96622          | 0.90123 | 5.15649        | 1.1457  | 4.32984          | 0.71247 | 5.66535       | 0.9858  | 3.26096         | 1.09918 | 2.80734      | 1.13331 |
| 740      | 7.312            | 1.36929 | 5.89676          | 0.86714 | 5.19984        | 1.17587 | 4.39952          | 0.68387 | 5.66348       | 0.97651 | 3.26278         | 1.09044 | 3.05255      | 1.36834 |
| 780      | 7.17328          | 1.24531 | 5.96223          | 0.89128 | 5.28169        | 1.22507 | 4.43523          | 0.67215 | 5.73677       | 0.99655 | 3.20176         | 1.07508 | 3.27969      | 1.56492 |
| 820      | 7.24296          | 1.25146 | 6.022            | 0.8776  | 5.32236        | 1.25085 | 4.38732          | 0.67042 | 5.80802       | 1.01053 | 3.24515         | 1.09192 | 3.38413      | 1.69297 |
| 840      | 7.38573          | 1.35143 | 6.06023          | 0.91055 | 5.314          | 1.19936 | 4.41234          | 0.65516 | 5.7591        | 0.99606 | 3.21546         | 1.084   | 3.41614      | 1.72569 |
